# Supplementary material for: Combined experimental and DFT approach to BiNbO4polymorphs
Source: Royal Society of Chemistry journal article supplement (doi:10.1039/d2ra07910k), 2023-01-01
Supplement: d2ra07910k1.pdf [file d2ra07910k1.pdf]

# Supplementary information for “Combined Experimental and DFT Approach to BiNbO<sub>4</sub> Polymorphs”

Md. Zarif Hossain,<sup>1</sup> Sadiq Shahriyar Nishat,<sup>2</sup> Shahran Ahmed,<sup>1</sup> Quazi Shafayat Hossain,<sup>1</sup> M. N. I. Khan,<sup>3</sup> Tarique Hasan,<sup>4</sup> Muhammad Shahriar Bashar,<sup>5</sup> A. K. M. Sarwar Hossain Faysal,<sup>1</sup> Ishtiaque M. Syed,<sup>6,7,8</sup> Khandker Saadat Hossain,<sup>9</sup> Sakhawat Hussain,<sup>1</sup> Md. Mosaddek Khan,<sup>10</sup> and Imtiaz Ahmed<sup>1,\*</sup>

<sup>1</sup>*Materials Science Research Laboratory,  
Department of Electrical and Electronic Engineering,  
University of Dhaka, Dhaka-1000, Bangladesh*

<sup>2</sup>*Department of Materials Science and Engineering,  
Rensselaer Polytechnic Institute, Troy, NY, USA*

<sup>3</sup>*Materials Science Division, Atomic Energy Centre, Dhaka-1000, Bangladesh*

<sup>4</sup>*Department of Physics, University of Jyväskylä, Jyväskylä, 40500, Finland*

<sup>5</sup>*Institute of Fuel Research and Development,  
Bangladesh Council of Scientific and Industrial Research, Dhaka-1205, Bangladesh*

<sup>6</sup>*Department of Physics, University of Dhaka, Dhaka-1000, Bangladesh*

<sup>7</sup>*Semiconductor Technology Research Centre,  
University of Dhaka, Dhaka-1000, Bangladesh*

<sup>8</sup>*Centre for Advanced Research in Sciences,  
University of Dhaka, Dhaka-1000, Bangladesh*

<sup>9</sup>*Nanophysics and Soft Matter Laboratory, Department of Physics,  
University of Dhaka, Dhaka-1000, Bangladesh*

<sup>10</sup>*Department of Computer Science and Engineering,  
University of Dhaka, Dhaka-1000, Bangladesh*

## EDX ANALYSIS

To perform chemical species identification of our samples Energy-dispersive X-ray spectroscopy (EDX) spectra of  $\alpha$ -BNO and  $\beta$ -BNO samples have been obtained as shown in Fig. S1. The weight percent wt. (%) and atomic percent at. (%) of chemical species Bi, Nb and O are displayed in Table S1.

| EDX Analysis  |         |         |         |
|---------------|---------|---------|---------|
| Sample        | Element | at. (%) | wt. (%) |
| $\alpha$ -BNO | Bi      | 16.47   | 51.65   |
|               | Nb      | 24.52   | 34.19   |
|               | O       | 59.01   | 14.16   |
| $\beta$ -BNO  | Bi      | 15.74   | 51.66   |
|               | Nb      | 22.49   | 32.81   |
|               | O       | 61.78   | 15.52   |

TABLE S1. Chemical species identification and atomic percentage at. (%) and weight percentage wt. (%) concentration analysis using EDX of  $\alpha$ -BNO and  $\beta$ -BNO respectively.

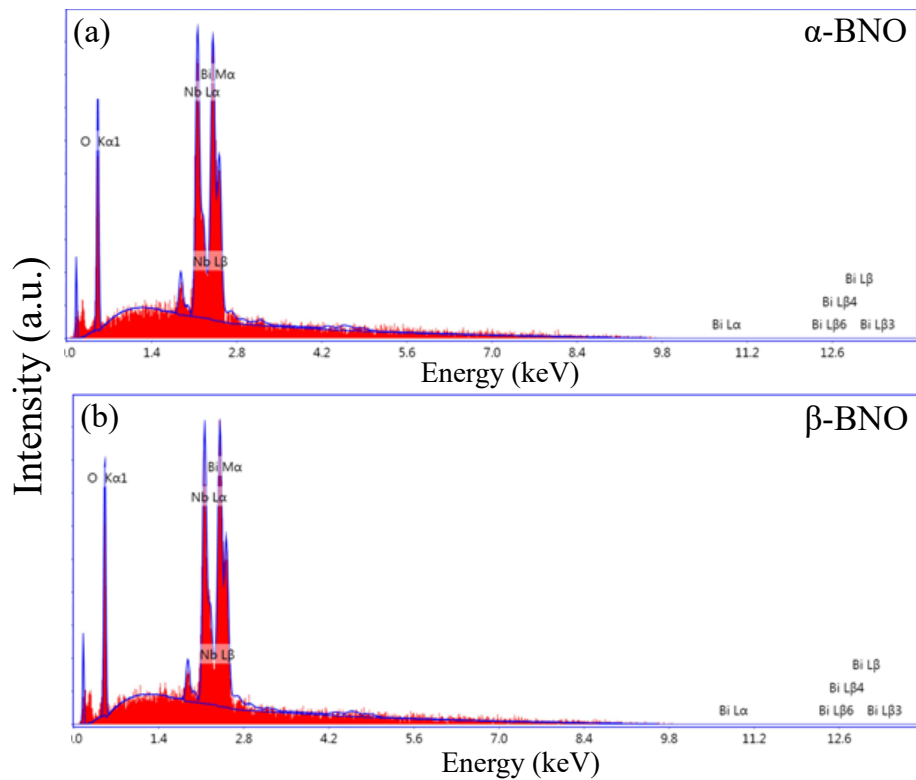

FIG. S1. EDX spectra of (a)  $\alpha$ -BNO, (b)  $\beta$ -BNO

## FOURIER TRANSFORM INFRARED SPECTROSCOPY (FTIR)

The FTIR absorption spectra of  $\alpha$ -BNO and  $\beta$ -BNO were characterized according to the relevant chemical bond vibrations in Table S2. The peaks in the GGA-PBE based phonon density of states were used to identify the FTIR peaks. The GGA-PBE provided good match for the FTIR absorption with the experimentally observed ones for both polymorphs.

| FTIR Peak Analysis           |                             |                              |                             |                                        |
|------------------------------|-----------------------------|------------------------------|-----------------------------|----------------------------------------|
| $\alpha$ -BNO                |                             | $\beta$ -BNO                 |                             | Peak Assign.                           |
| Exp.<br>( $\text{cm}^{-1}$ ) | DFT<br>( $\text{cm}^{-1}$ ) | Exp.<br>( $\text{cm}^{-1}$ ) | DFT<br>( $\text{cm}^{-1}$ ) |                                        |
| 400                          | 395                         | -                            | -                           | Bi-O Stretching                        |
| -                            | -                           | 454                          | 448                         | Bi-O Stretching                        |
| 480                          | 480                         | -                            | -                           | Bi-O Stretching                        |
| 540                          | 538                         | 542                          | 546                         | NbO <sub>6</sub> Octahedral Stretching |
| -                            | -                           | 598                          | 601                         | NbO <sub>6</sub> Octahedral Stretching |
| -                            | -                           | 846                          | 841                         | Bi-O-Bi Stretching                     |
| 888                          | 840                         | -                            | -                           | Bi-O-Bi Stretching                     |
| 1014                         | -                           | -                            | -                           | BiO <sub>6</sub> Octahedral Stretching |
| 1036                         | -                           | -                            | -                           | BiO <sub>6</sub> Octahedral Stretching |
| 1056                         | -                           | -                            | -                           | BiO <sub>6</sub> Octahedral Stretching |
| 1250                         | -                           | -                            | -                           | Nb-O Stretching                        |
| 1394                         | -                           | -                            | -                           | -OH Bending                            |

TABLE S2. RT experimental (Exp.) and DFT based FTIR peaks of both  $\alpha$ -BNO and  $\beta$ -BNO.

## ELECTRONIC PROPERTIES SIMULATION

The HSE06 spin-polarized total density of states (TDOS) and its projection onto the different constituent atomic orbitals as a function of energy  $E$  within a range of 14 eV window containing the Fermi level ( $E_F$ ) in the middle for both  $\alpha$ -BNO and  $\beta$ -BNO are shown in Fig. S2. Here Hartree-Fock exchange  $\alpha_{\text{HF}} = 25\%$  and the gap between the highest occupied molecular orbital (HOMO) and lowest unoccupied molecular orbital (LUMO) is 4 and 3.65 eV for  $\alpha$ -BNO and  $\beta$ -BNO respectively. By changing the  $\alpha_{\text{HF}}$ , we can tune the energy band gap of both polymorphs as can be shown from band structure simulation in Fig. S3. The indirect band gap  $E_g$  can be shrunk to 3.84 and 3.41 eV by reducing the  $\alpha_{\text{HF}}$  to 15% and 10% from 25% in the case of the  $\alpha$ -BNO, see Fig. S3(a)&(b). Similarly, the direct  $E_g$  can be reduced to 3.65 eV with the use of  $\alpha_{\text{HF}} = 15\%$  as shown in Fig. S3(c).

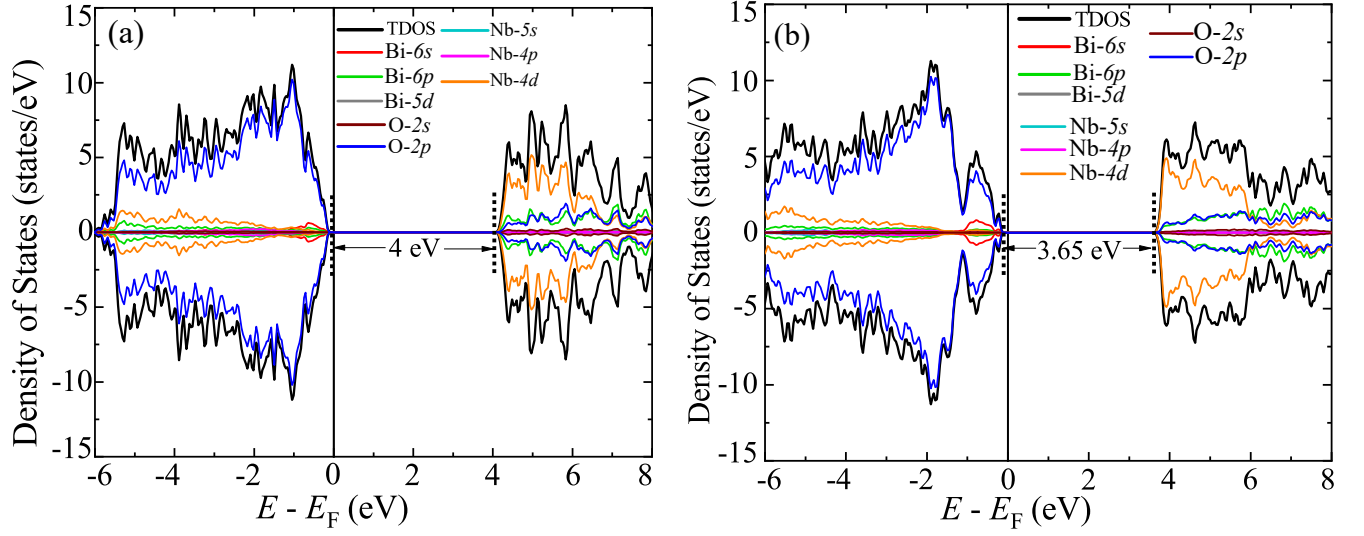

FIG. S2. Spin polarized total density of states (TDOS) and its projection onto different orbitals of Bi, Nb and O in (a)  $\alpha$ -BNO and (b)  $\beta$ -BNO using HSE06 with  $\alpha_{\text{HF}} = 25\%$ .

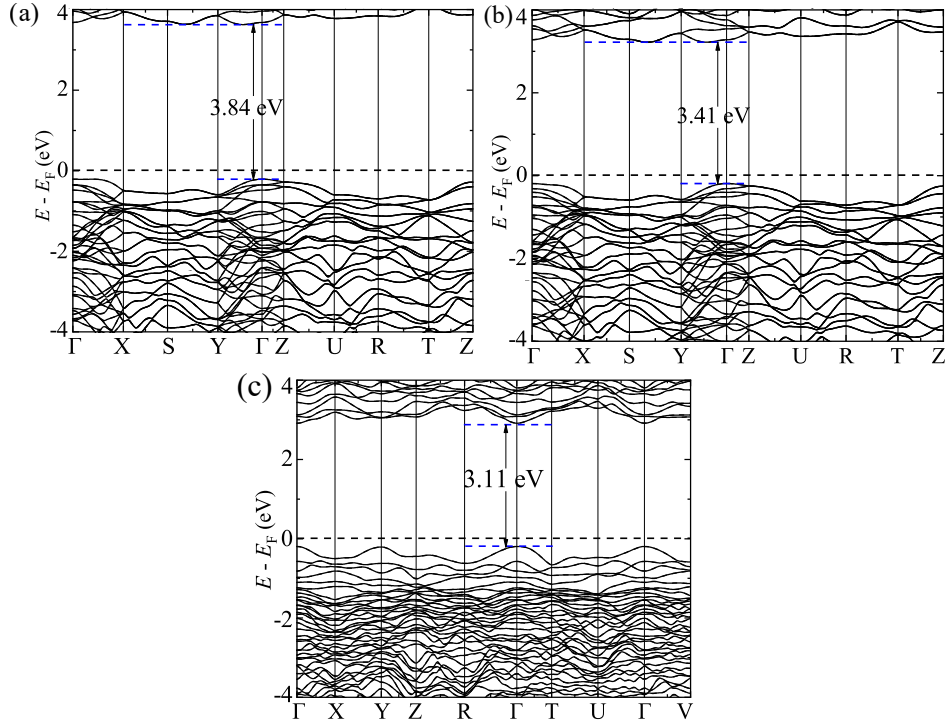

FIG. S3. Electronic band structure along high symmetry k-points  $\Gamma$ , Y, Z, S, X, Z, U, R, T and V for (a)  $\alpha$ -BNO with  $\alpha_{\text{HF}} = 15\%$ , (b)  $\alpha$ -BNO with  $\alpha_{\text{HF}} = 10\%$  and (c)  $\beta$ -BNO with  $\alpha_{\text{HF}} = 10\%$  using HSE06 functional.

## OPTICAL PROPERTIES SIMULATION

The optical Loss Function  $L$ , Extinction Coefficient  $K$ , Reflectance  $R$  and Optical Conductivity  $\sigma$  are simulated using GGA-PBE and HSE06 functional for both  $\alpha$ -BNO and  $\beta$ -BNO as can be seen from Fig. S4.

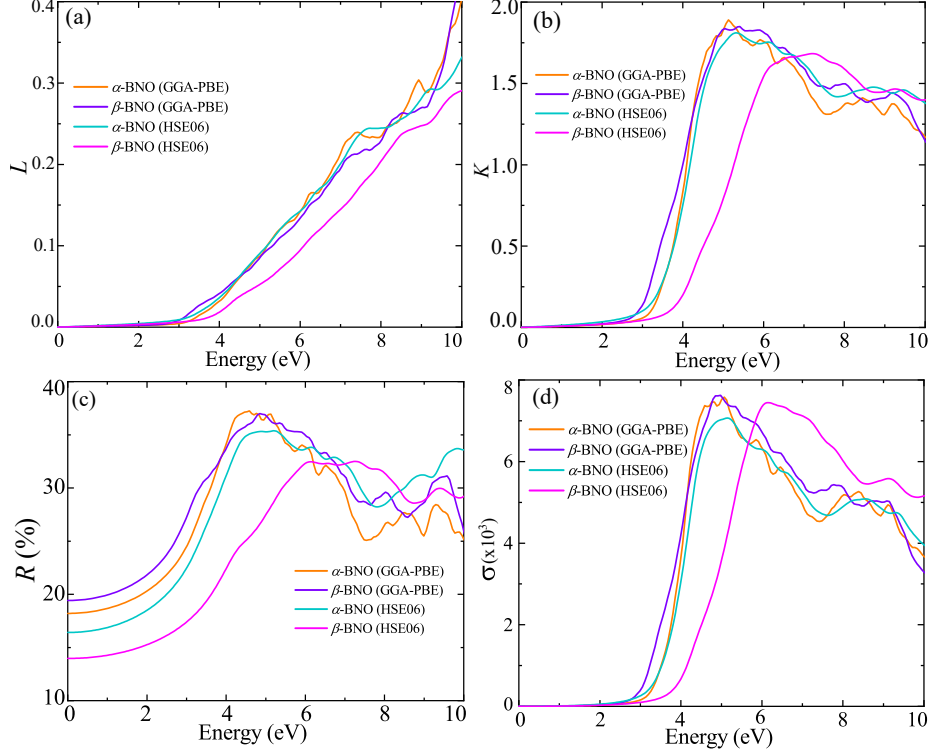

FIG. S4. Optical properties (a) Loss Function  $L$ , (b) Extinction Coefficient  $K$ , (c) Reflectance  $R$ , (d) Optical Conductivity  $\sigma$  as a function photon energy  $E$  calculated from GGA-PBE and HSE06 functional averaged over three different polarization  $E_x$ ,  $E_y$  and  $E_z$  in case of  $\alpha$ -BNO ( $\alpha_{\text{HF}} = 2\%$ ) and  $\beta$ -BNO ( $\alpha_{\text{HF}} = 20\%$ ).

## PHOTOCATALYTIC MEASUREMENTS

The MB dye degradation fraction  $C/C_0$  is plotted for both  $\alpha$ -BNO and  $\beta$ -BNO in Fig. S5(a), where  $C_0$  marks the initial MB dye concentration and  $C$  represents the same at some specific irradiation exposure time  $t$ . The photocatalytic degradation efficiency (%) of the MB is defined as  $(C_0 - C)/C_0 \times 100$ . By assuming linear reaction kinematics, the MB

dye degradation reaction can be modeled as  $\ln(C/C_0) = kt$ , where  $k$  defines the reaction rate. By linear fitting the  $\ln(C/C_0)$  vs.  $t$ , as shown in Fig. S5(b), one can estimate the value of  $k$ . The estimated values of  $k$  for both  $\alpha$ -BNO and  $\beta$ -BNO are presented in Fig. S5(c).

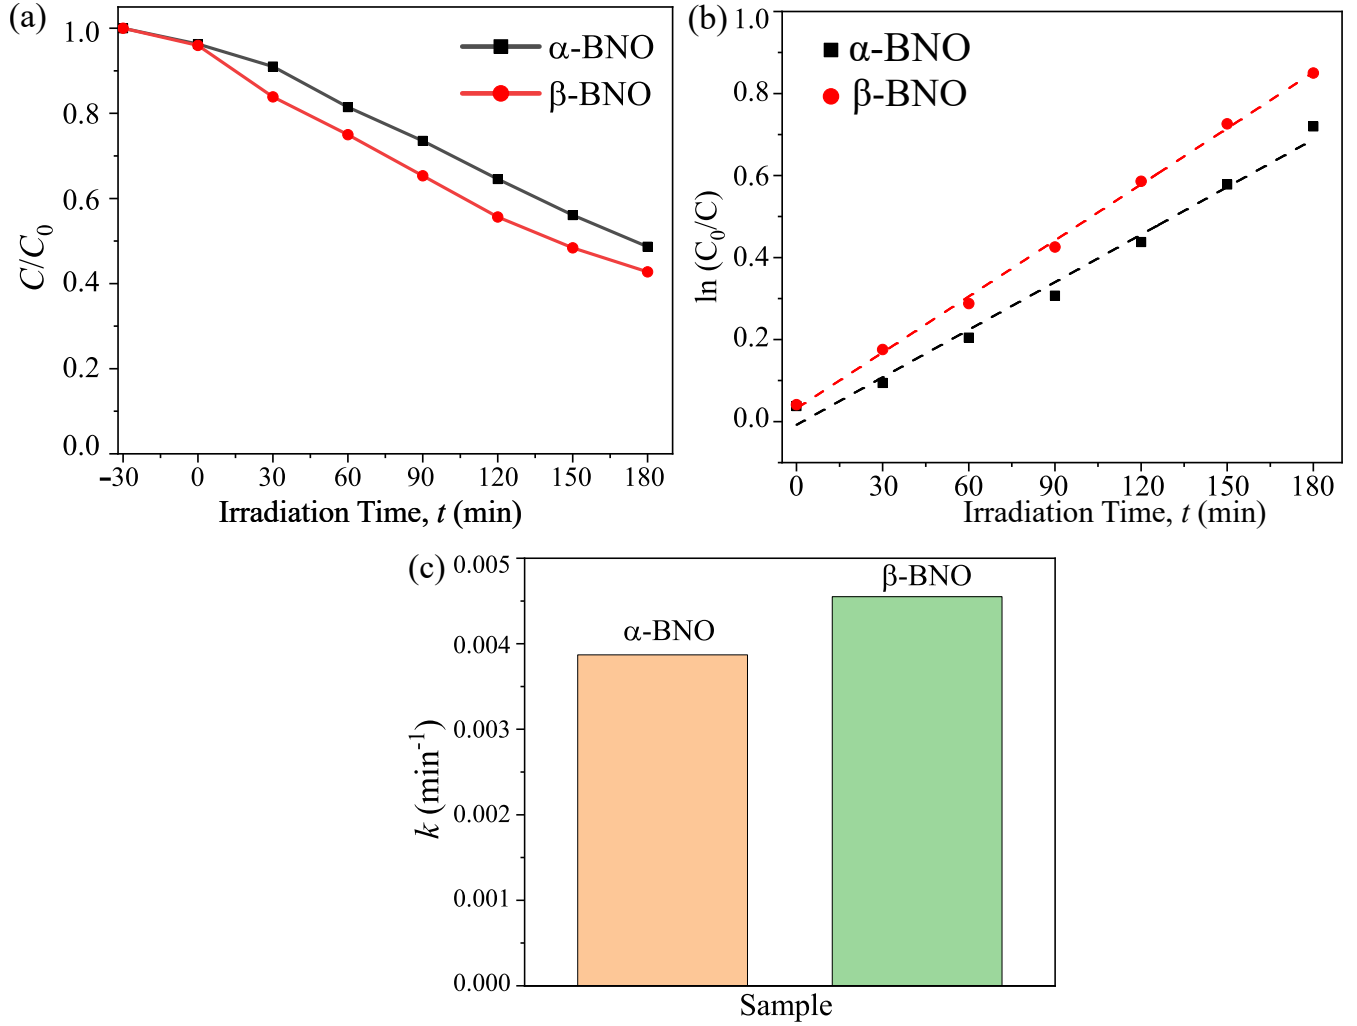

FIG. S5. (a) Time-dependent photocatalytic degradation fraction  $C/C_0$ , (b) Linear fitted time-dependent photocatalytic degradation fraction of MB and (c) Comparison among reaction rate constant  $k$  of both  $\alpha$ -BNO and  $\beta$ -BNO.

\* imtiaz@du.ac.bd
